# Supplementary material
Source: PubMed Central journal article supplement (PMC2442359)
Supplement: M800234200_1.pdf [file M800234200_1.pdf]

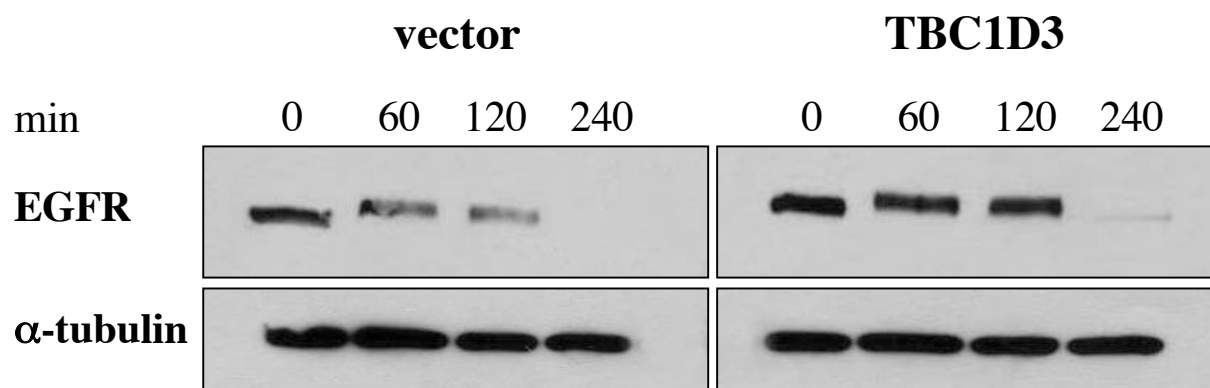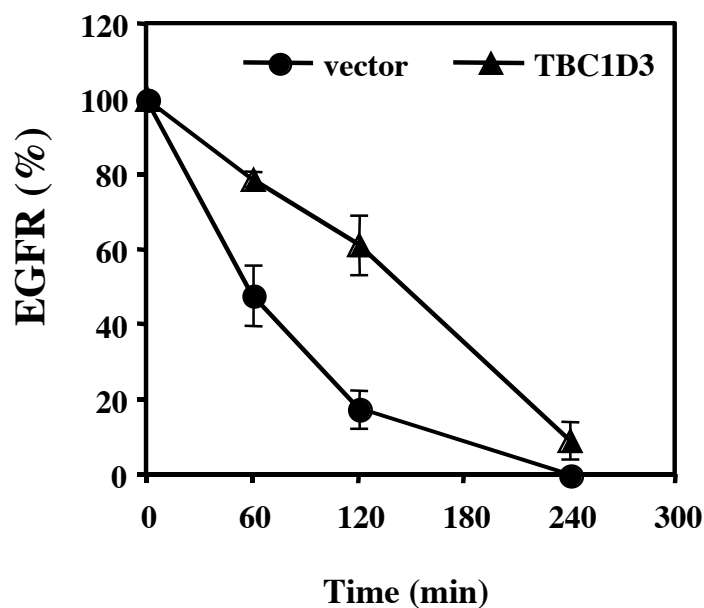

**Supplemental Data 3: TBC1D3 delays EGFR degradation in mouse cells.** NR6:hEGFR cells expressing TBC1D3 or vector were incubated with 100 ng/ml EGF for the indicated times. Each lysate (10  $\mu$ g protein) was analyzed by SDS-PAGE and proteins were detected with the indicated antibodies. Data are presented as the % of EGFR at each time point over the amount in each sample at 0 min. The data are presented as means  $\pm$  SD of three independent experiments.
