# Supplementary material
Source: PubMed Central journal article supplement (PMC2442359)
Supplement: M800234200_2.pdf [file M800234200_2.pdf]

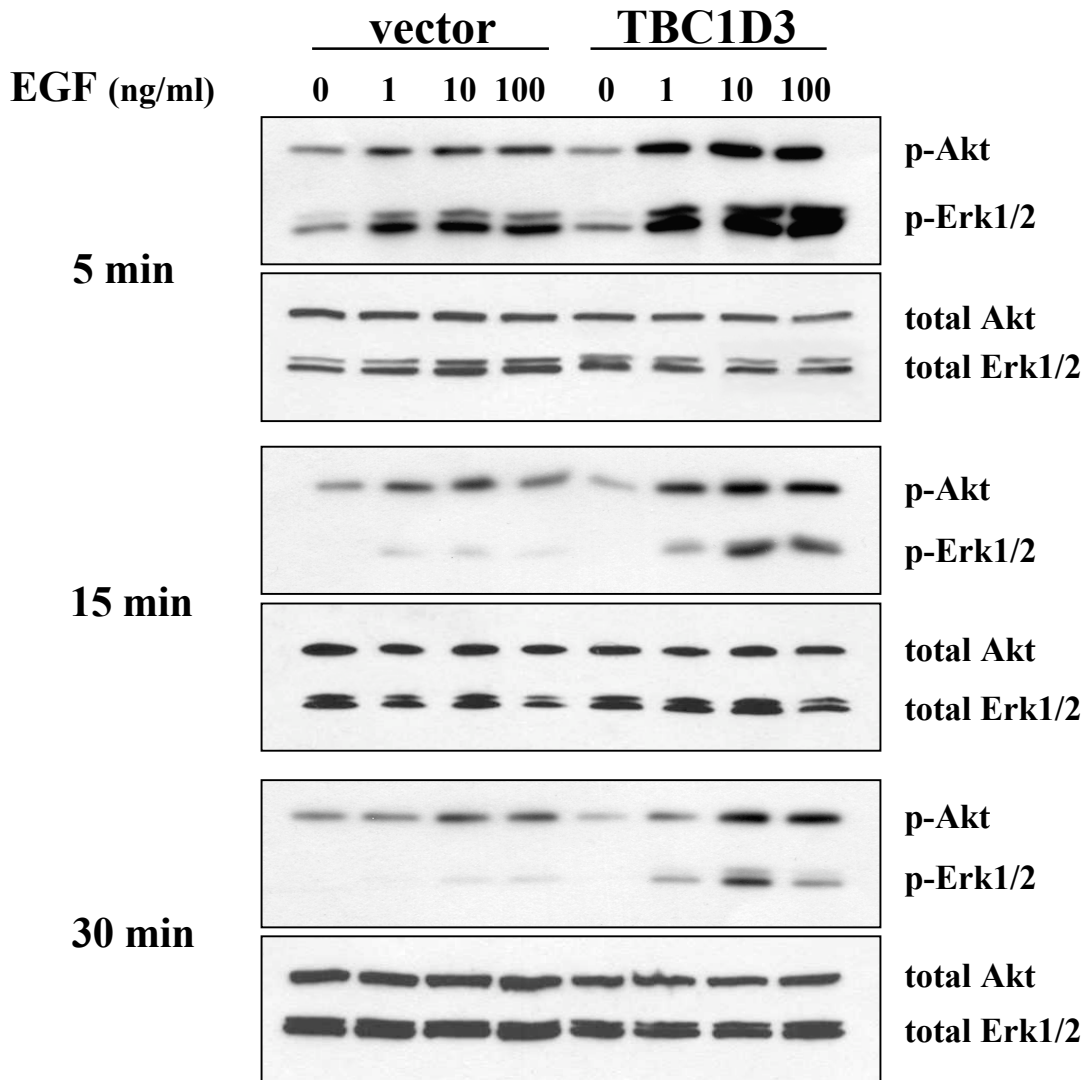

**Supplemental Data 1: TBC1D3 induces activation of Akt and Erk1/2 following EGF stimulation in mouse cells.** NR6:hEGFR cells expressing TBC1D3 or vector alone were incubated in the presence of different concentrations of EGF at 37°C for the indicated times. Stimulation was terminated by washing the cells with ice-cold PBS. Cells lysates were prepared and proteins (10 µg) were resolved by SDS-PAGE and detected by Western blot as described. *The levels of p-Erk and p-Akt in non-treated cells (time 0) were not consistent from experiment to experiment. In 55 % of the studies an increment in phosphorylation was observed in cells transfected with TBC1D3.*
