# Supplementary material
Source: PubMed Central journal article supplement (PMC2442359)
Supplement: M800234200_3.pdf [file M800234200_3.pdf]

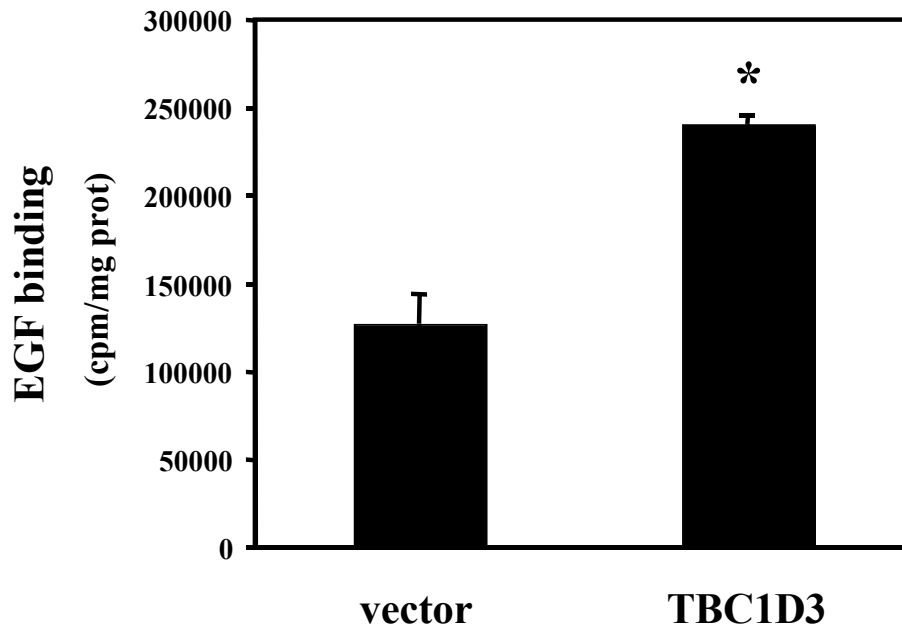

**Supplemental Data 2: TBC1D3 increases EGF binding.** NR6:hEGFR cells expressing TBC1D3 or vector alone were incubated with  $^{125}\text{I}$ -EGF (70 ng/ml) for 3 h at 4°C. Surface-bound ligands were released by incubation in ice-cold “acid strip” buffer as described in Experimental Procedures. The data are presented as means  $\pm$  SD of three independent (\* $p < 0.01$ ).
